# Supplementary material
Source: Springer Nature journal article supplement (https://www.springermedizin.de/resource/supplementary/12950_2013_364_MOESM1_ESM.pdf/9557666)

## Additional data

**File 1 Human IPE and RPE stained for cytokeratin.** The primary IPE and RPE, cultured from iris and retina, of human donors, were probed with anti-pan cytokeratin antibody (1:200 dilution; **A**) and an isotype control antibody (mouse IgG<sub>1</sub>; 1: 200 dilution). Immunohistochemistry was performed to confirm the epithelial origin of primary IPE and RPE. A representative of cytokeratin stained IPE was shown in **A** and no staining was seen in the negative control (IgG). The result was confirmed by flow cytometry (**B**). The peak representing cytokeratin stained cells (in pink) was shifted away from that of the isotype control antibody (in grey).

### A. Cytokeratin stained IPE cells

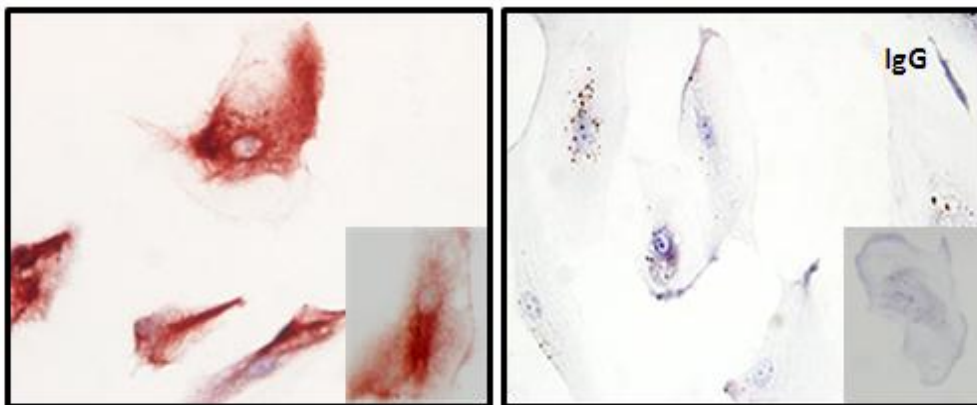

### B. Cytokeratin stained cells by Flow cytometry

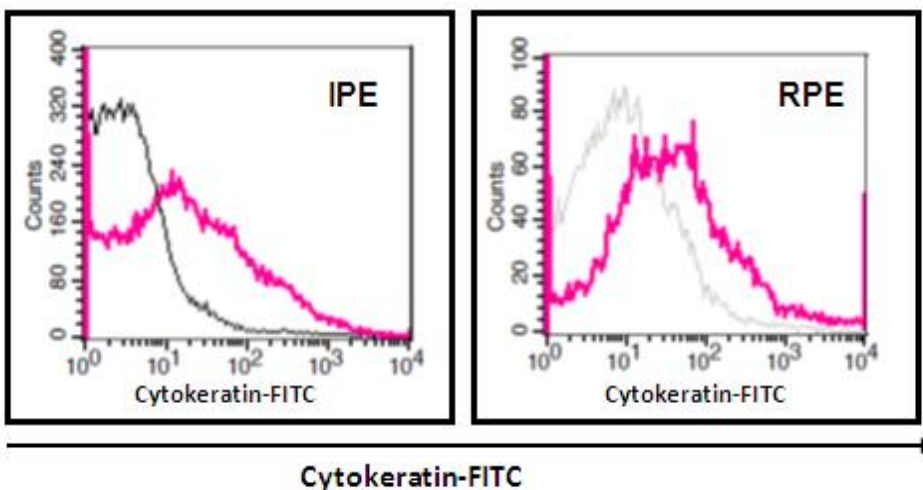

Supplement: MOESM1 [file 9557666]
